# Supplementary material for: Fenton Reaction Induced Cancer in Wild Type Rats Recapitulates Genomic Alterations Observed in Human Cancer
Source: PubMed Central journal article supplement (PMC3430702; doi:10.1371/journal.pone.0043403), 2012-08-29
Supplement: pone.0043403.s005.pdf [file pone.0043403.s005.pdf]

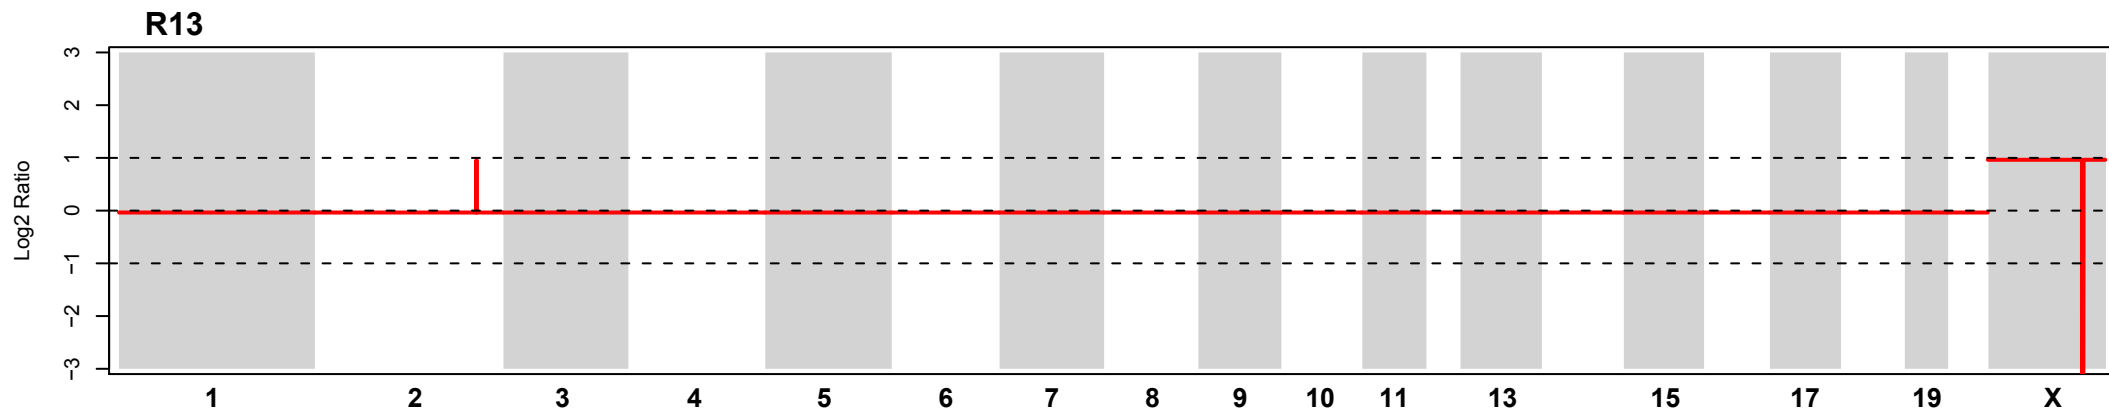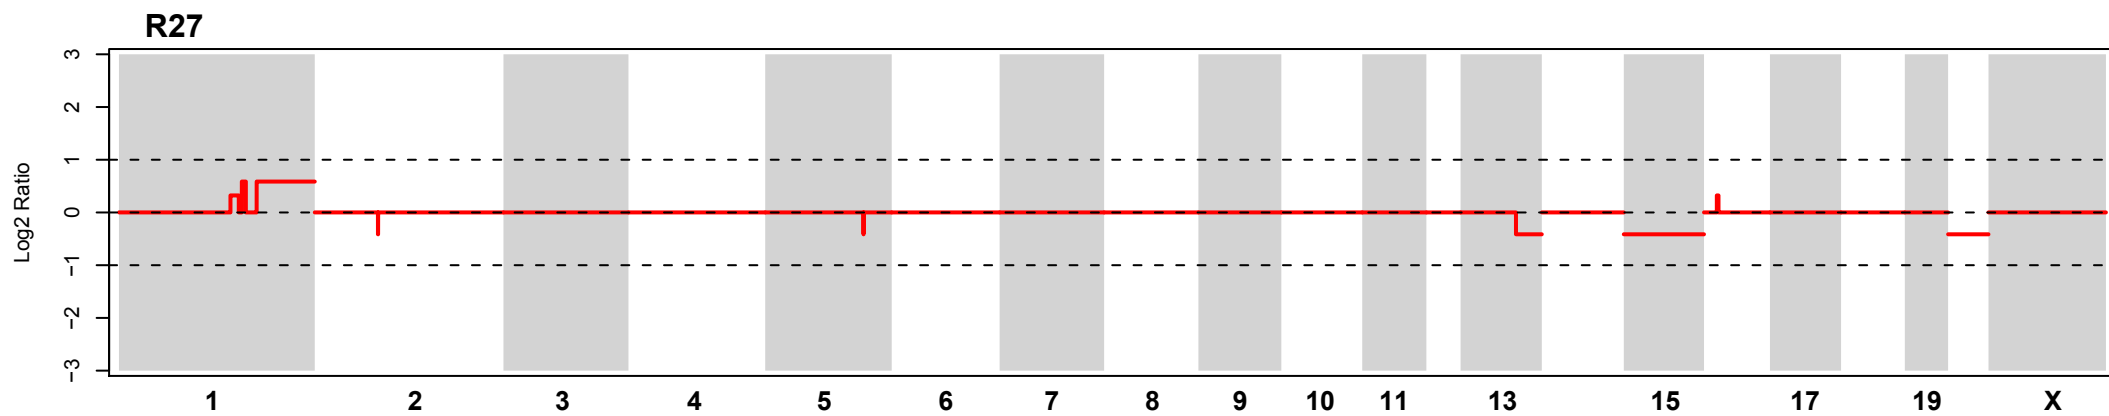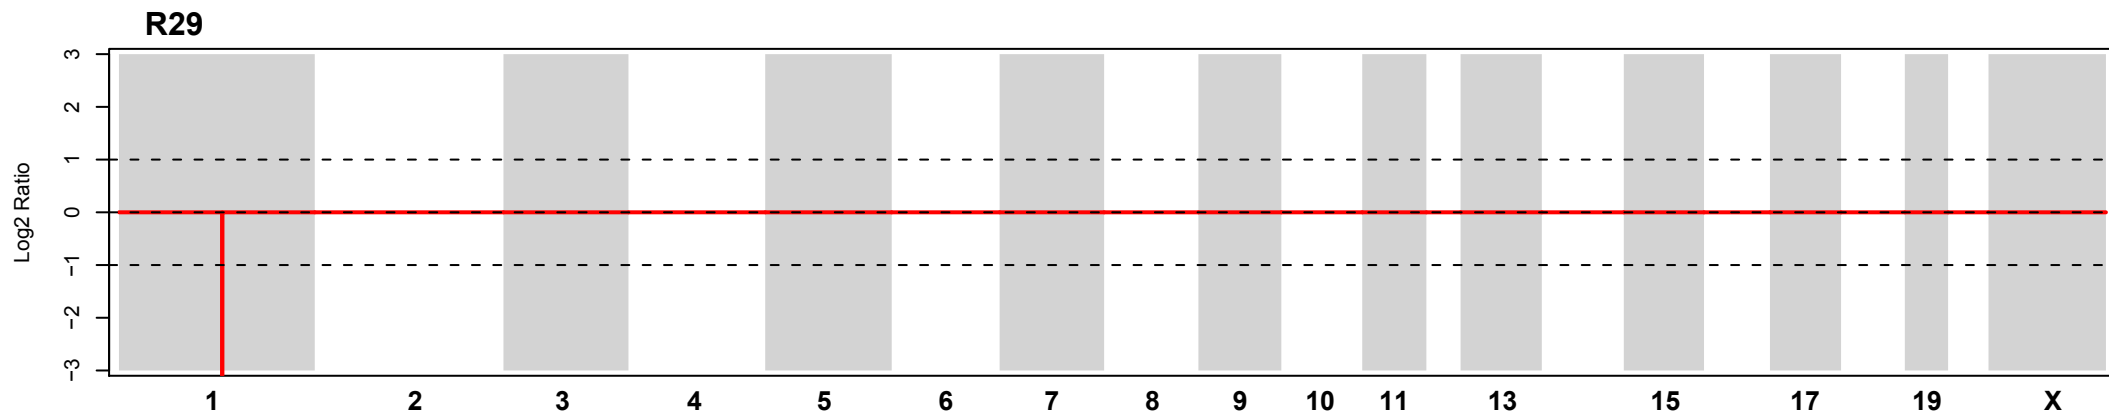

Figure S5
