# Supplementary material for: Fenton Reaction Induced Cancer in Wild Type Rats Recapitulates Genomic Alterations Observed in Human Cancer
Source: PLoS One. 2012 Aug 29;7(8):e43403. doi: 10.1371/journal.pone.0043403 (PMC3430702; doi:10.1371/journal.pone.0043403)
Supplement: Table S1 — List of genes completely deleted in more than two RCC tumors. (XLS) [file pone.0043403.s006.xls]

## Sheet: statGeneComp.HD.tumors
Name	Chro	Start	End	Symbol	Frequency	Sample
NM_001000683	3	69260168	69261128	Olr483	2	BF57-5, FB21-2
NM_001000306	3	69275308	69276256	Olr484	2	BF57-5, FB21-2
NM_001000645	3	72350736	72351678	Olr636	2	BF57-5, FB21-2
NM_001001126	3	72370159	72371089	Olr637	2	BF57-5, FB21-2
NM_001000340	3	72398630	72399572	Olr639	2	BF57-5, FB21-2
NR_037332	5	108502868	108502986	Mir3554	2	BF57-5, FB-45-4
NR_031845	5	108502874	108502980	Mir31	2	BF57-5, FB-45-4
NM_001047867	5	108793950	108867131	Mtap	3	BF57-5, FB21-2, FB-45-4
NM_031550	5	108913974	108921606	Cdkn2a	4	BF57-5, FB21-2, FB-45-4, FB59-1
NM_130812	5	108944894	108950519	Cdkn2b	4	BF57-5, FB21-2, FB-45-4, FB59-1
NM_001107945	5	109342992	109349533	Dmrta1	3	BF57-5, FB21-2, FB-45-4
NM_001109357	5	109880185	109882029	Zfp352	3	BF57-5, FB21-2, FB-45-4
NM_173309	5	111184101	111310206	Elavl2	3	BF57-5, FB21-2, FB-45-4
NM_001099477	14	842907	851338	Vom2r70	3	BF57-5, FB-45-4, FB59-1
NM_001099516	14	893640	917991	Vom2r71	3	BF57-5, FB-45-4, FB59-1
NM_031533	14	22154369	22178222	Ugt2b	2	BF57-5, FB59-1
NM_001000893	20	247818	248757	Olr1678	3	BF51-1, BF57-5, FB21-2
NM_001000892	20	261422	262361	Olr1679	3	BF51-1, BF57-5, FB21-2
NM_001000891	20	274511	275555	Olr1680	3	BF51-1, BF57-5, FB21-2
NM_001001006	20	289689	290628	Olr1681	3	BF51-1, BF57-5, FB21-2
